# Supplementary material for: Titanocene dichloride (Cp2TiCl2) as a precursor for template-free fabrication of hollow TiO2nanostructures with enhanced photocatalytic hydrogen production
Source: Royal Society of Chemistry journal article supplement (doi:10.1039/c6nr09730h), 2017-01-01
Supplement: c6nr09730h1.pdf [file c6nr09730h1.pdf]

## Supporting Information

### **Titanocene dichloride (Cp<sub>2</sub>TiCl<sub>2</sub>) as precursor for template-free fabricating hollow TiO<sub>2</sub> nanostructures with enhanced photocatalytic hydrogen production**

*Haiqing Wang, Haifeng Lin, Yong Long, Bing Ni, Ting He, Simin Zhang,  
Huihui Zhu and Xun Wang\**

Key Lab of Organic Optoelectronics and Molecular Engineering,  
Department of Chemistry, Tsinghua University, Beijing 100084, China.

E-mail: [wangxun@mail.tsinghua.edu.cn](mailto:wangxun@mail.tsinghua.edu.cn)

**Table S1** Control experiments for the tunable synthesis of TiO<sub>2</sub> nanostructures

| Series | Variables                                                |                 |                          |
|--------|----------------------------------------------------------|-----------------|--------------------------|
| A      | The amount of ammonia<br>(25 wt.%)                       | Sample          | Ammonia /mL.             |
|        |                                                          | A-0.2           | 0.2                      |
|        |                                                          | A-0.5           | 0.5                      |
|        |                                                          | A-1.0           | 1.0                      |
|        |                                                          | A-2.0           | 2.0                      |
|        |                                                          | A-3.0           | 3.0                      |
| B      | The amount of titanocene dichloride<br>(without ammonia) | Sample          | Titanocene dichloride /g |
|        |                                                          | B-0.05          | 0.05                     |
|        |                                                          | B-0.08          | 0.08                     |
|        |                                                          | B-0.10          | 0.10                     |
|        |                                                          | B-0.12          | 0.12                     |
|        |                                                          | B-0.15          | 0.15                     |
|        |                                                          | B-0.17          | 0.17                     |
| B-0.20 | 0.20                                                     |                 |                          |
| C      | Ammonia concentration                                    | Sample          | Concentration /wt.%      |
|        |                                                          | D-0             | 0                        |
|        |                                                          | D-10            | 10                       |
| D      | The amount of titanocene dichloride<br>(0.5 mL 25 wt.%)  | Sample          | Titanocene dichloride /g |
|        |                                                          | C-0.07          | 0.07                     |
|        |                                                          | C-0.10          | 0.10                     |
|        |                                                          | C-0.12          | 0.12                     |
| E      | Temperature                                              | Sample          | T /°C                    |
|        |                                                          | E-150           | 150                      |
|        |                                                          | E-180           | 180                      |
|        |                                                          | E-200           | 200                      |
| F      | Reaction time                                            | Sample          | t /h                     |
|        |                                                          | F-2             | 2                        |
|        |                                                          | F-6             | 6                        |
|        |                                                          | F-8             | 8                        |
|        |                                                          | F-12            | 12                       |
|        |                                                          | F-16            | 16                       |
| S      | Types of solvents                                        | solvent         |                          |
|        |                                                          | Deionized water |                          |
|        |                                                          | Ethanol         |                          |
|        |                                                          | Acetic acid     |                          |
|        |                                                          | Glycol          |                          |

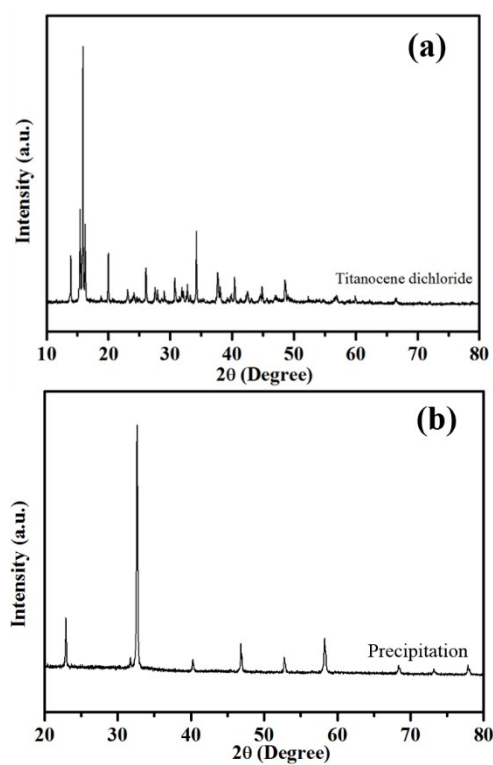

**Fig. S1** XRD patterns of titanocene dichloride (a) and the collected precipitation before heat-treatment (b).

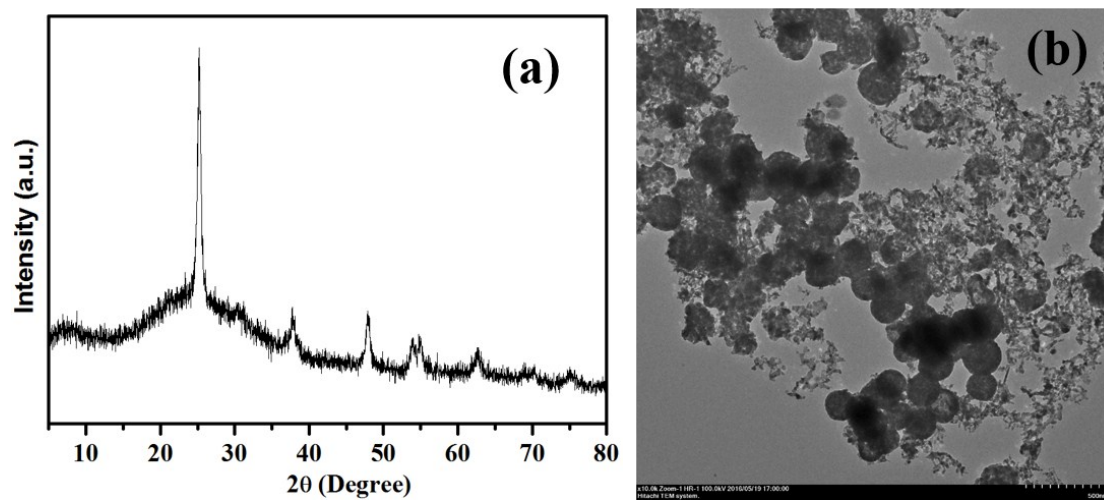

Fig. S2 (a) XRD pattern and (b) TEM image of  $\text{TiO}_2$  synthesized with direct calcination.

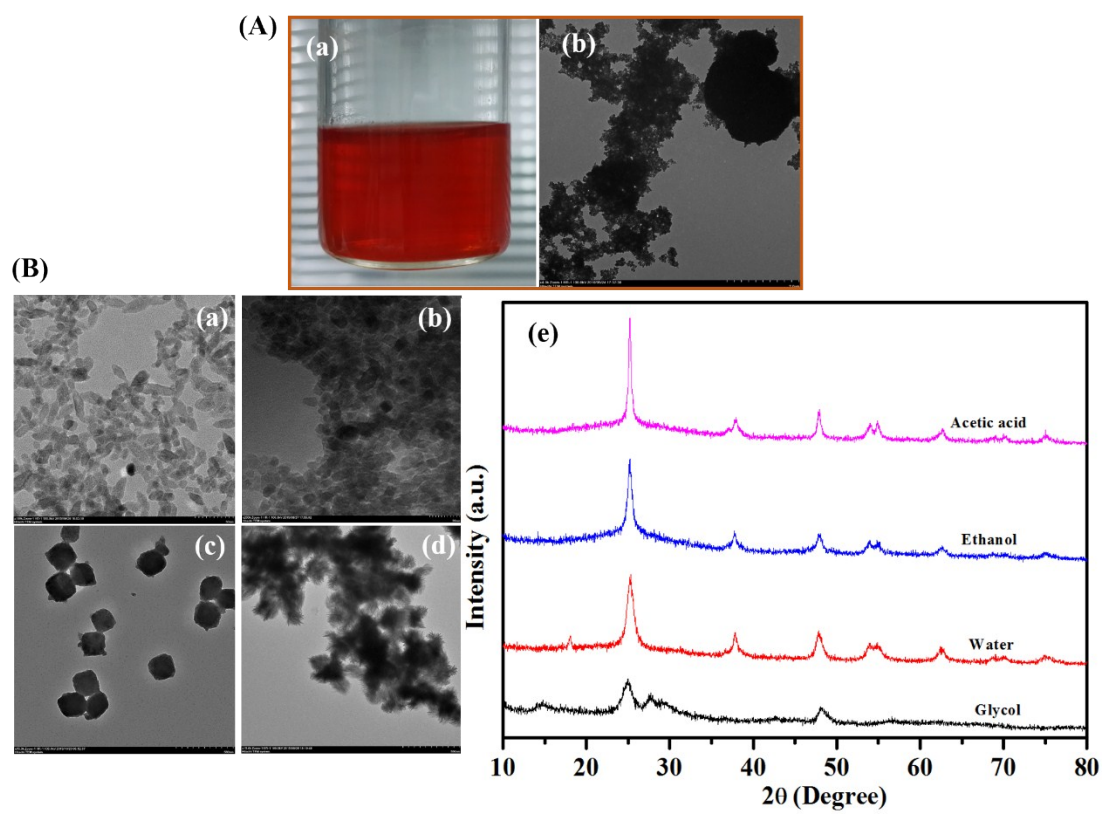

**Fig. S3** (A) Digital photo (a) and TEM image (b) of  $\text{TiO}_2$  with NaOH as alkali source, and (B) TEM images of  $\text{TiO}_2$  anoparticles/nanosheet synthesized with (a) deionized water, (b) ethanol, (c) acetic acid, and (d) glycol as solvent, and (e) their corresponding XRD patterns.

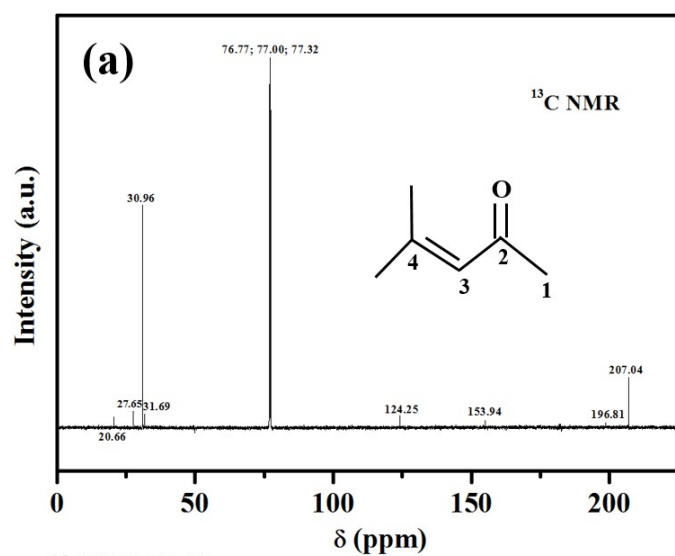

<sup>13</sup>C NMR Data

Mesityl oxide (4-methyl-3-penten-2-one)

<sup>13</sup>C NMR  $\delta$  = 196.8 (C2), 153.9 (C4), 124.2 (C3), 31.6 (C1), 27.6, 20.6 (CH<sub>3</sub>)

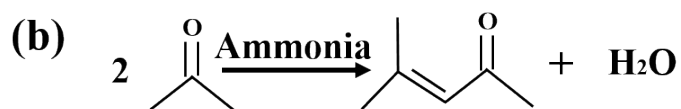

Fig. S4 (a) <sup>13</sup>C NMR data of the production solution and (b) chemical reaction of acetone at given conditions.

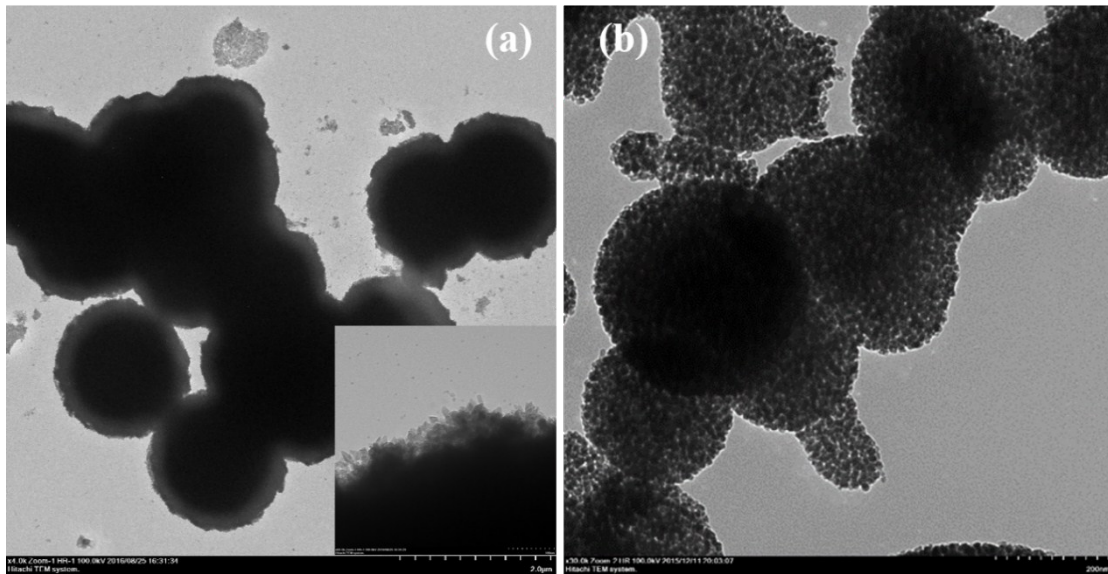

**Fig. S5** TEM images of  $\text{TiO}_2$  synthesized with  $\text{TiCl}_4$  (a) and titanate tetrabutyl (b) as titanium source.

The inset of Fig. S5a shows that the edge of microsphere consists of octahedral double cones. Then, the formation of octahedral double cone in this paper should be arisen from the presence of chloride ion ( $\text{Cl}^-$ ).

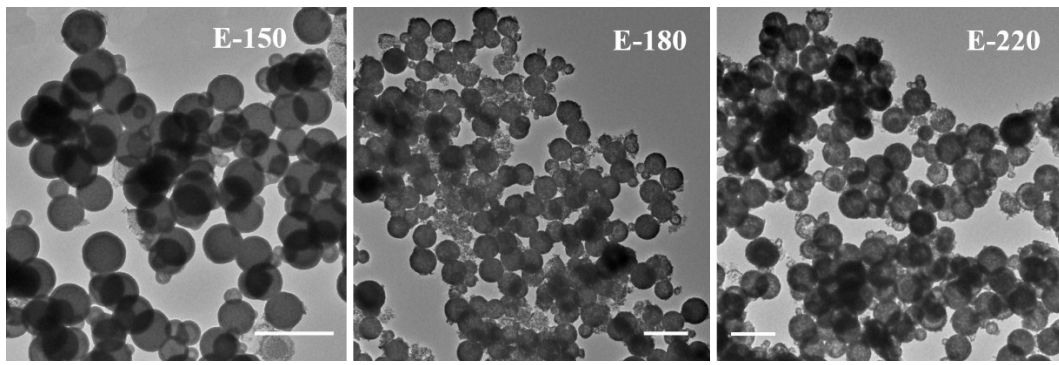

**Fig. S6** TEM images of E series HTSs synthesized with different solvothermal temperature (scale bar 500 nm).



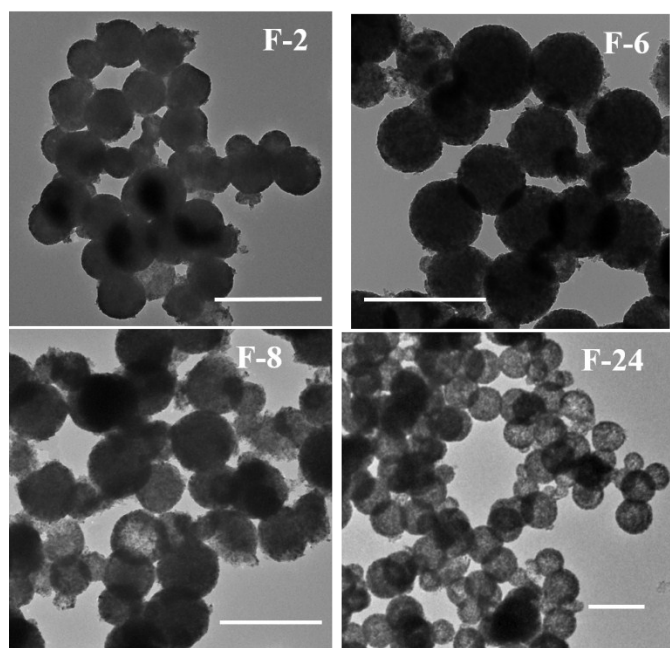

**Fig. S7** TEM images of F series HTSs synthesized with different solvothermal time (scale bar 500 nm).

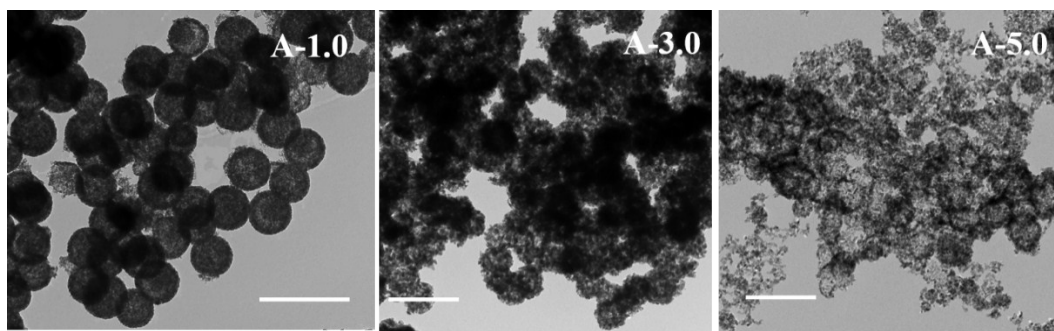

**Fig. S8** TEM images of A series HTSs synthesized with varied amount of ammonia (scale bar 500 nm).

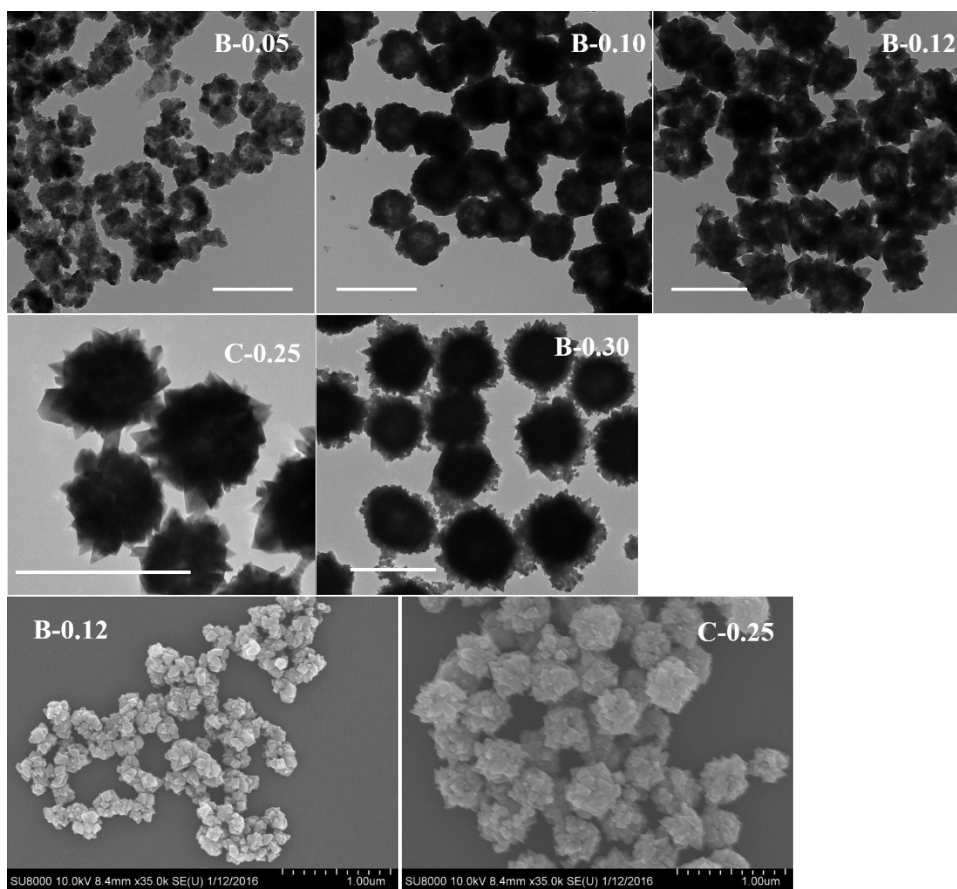

**Fig. S9** TEM and SEM images of B series HTSs synthesized with varied amount of titanium precursor (without ammonia, scale bar 500 nm).

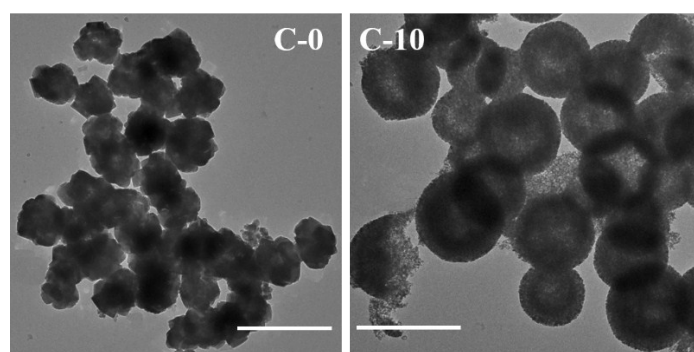

**Fig. S10** TEM images of C series HTSs synthesized with varied concentration of ammonia (0.5 mL, scale bar 500 nm).

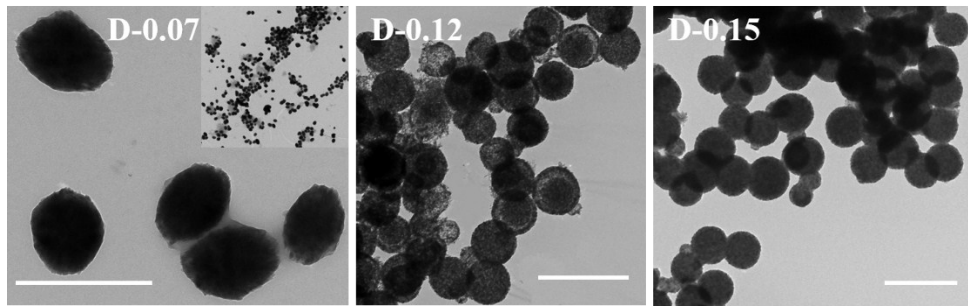

**Fig. S11** TEM images of D series HTSs synthesized with varied amount of titanium precursor (0.5 mL concentrated ammonia, scale bar 500 nm).

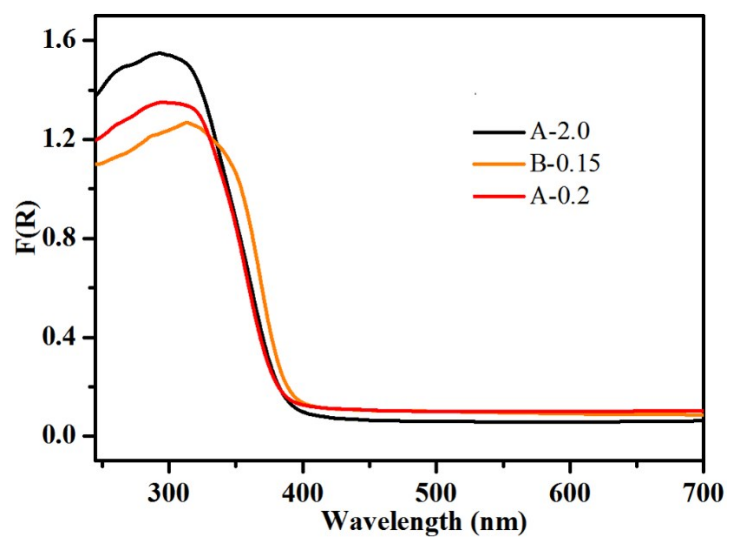

**Fig. S12** UV-vis spectra of calcined A-2.0, B-0.15, and A-0.2 samples (450 °C for 2h).

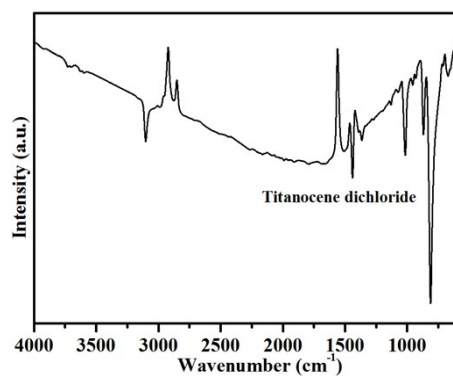

**Fig. S13** FTIR spectrum of titanocene dichloride

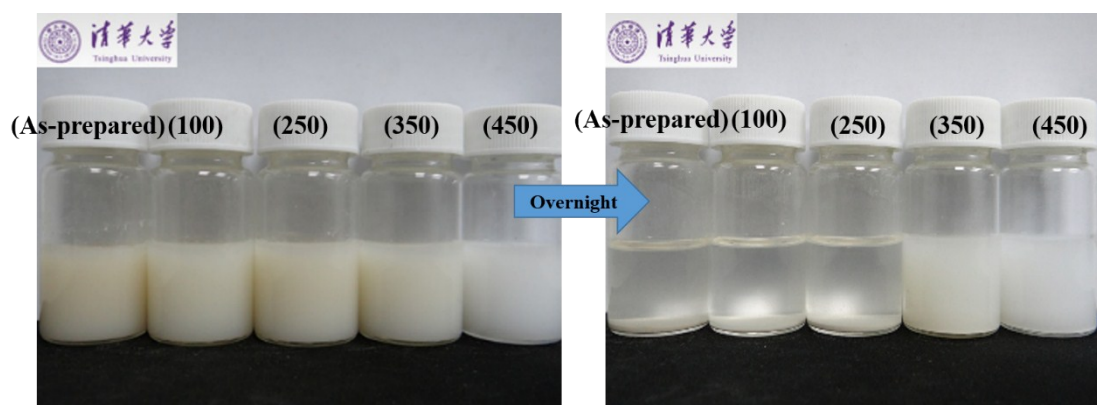

**Fig. S14** Digital photos of dispersion in water of THSs calcined with different temperatures (as-prepared, 100, 250, 350, and 450 for 2h).



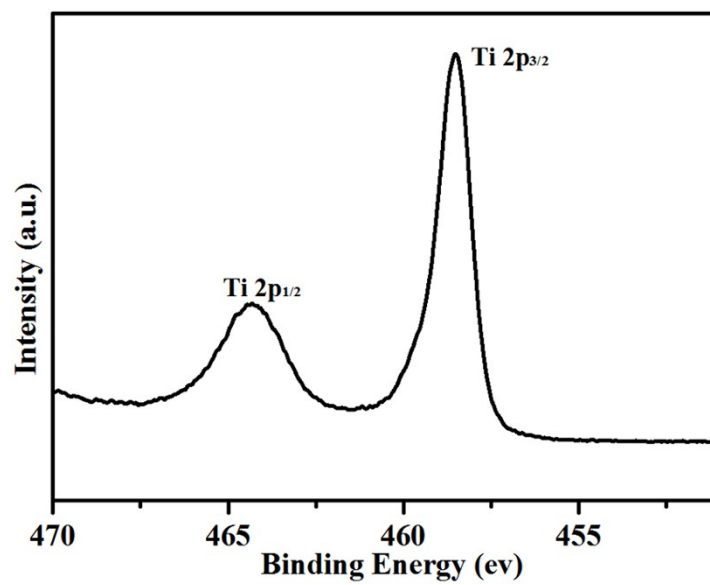

Fig. S15 XPS spectra of Ti 2p of calcined HTSs (450°C, 2h).

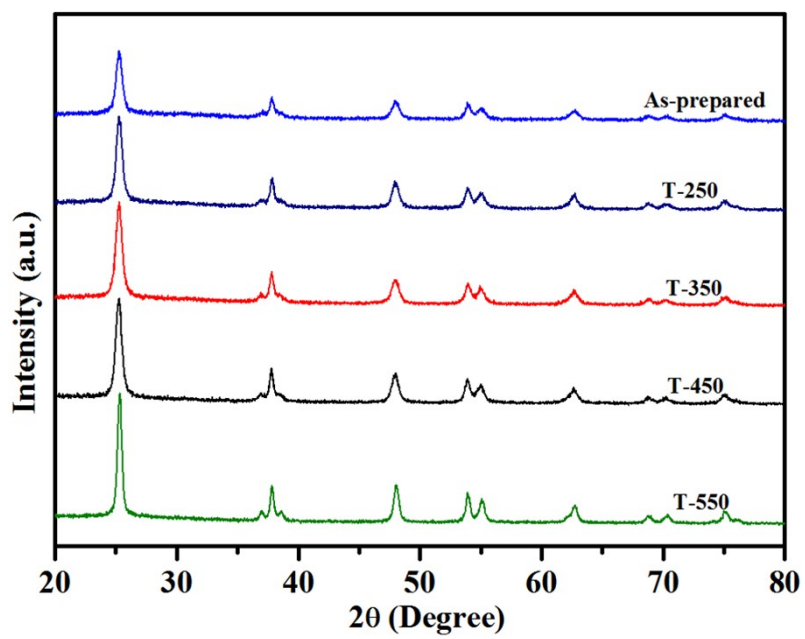

Fig. S16 XRD patterns of HTSs calcined with different temperatures (as-prepared, 250, 350, 450, and 550).
